## ERRATUM

### Major Adverse Events and Relationship to *Nil per Os* Status in Pediatric Sedation/Anesthesia outside the Operating Room: A Report of the Pediatric Sedation Research Consortium: Erratum

In the January 2016 issue, the article beginning on page 80 included errors in the numbers of procedures given in the column headings and in the footnotes of tables 1 and 2. The corrected tables 1 and 2 are included below, with the corrected numbers in red.

**Table 1.** Procedures Performed by NPO Status

|                                             | NPO<br>N = 82,546 | Not NPO<br>N = 25,401 | Missing NPO<br>N = 31,195 |
|---------------------------------------------|-------------------|-----------------------|---------------------------|
| Airway (bronchoscopy)                       | 713 (0.86)        | 202 (0.80)            | 369 (1.18)                |
| Bone (fracture reduction)                   | 1,699 (2.06)      | 949 (3.74)            | 554 (1.78)                |
| Cardiac (catheterization or echocardiogram) | 966 (1.17)        | 303 (1.19)            | 480 (1.54)                |
| Dental                                      | 485 (0.59)        | 70 (0.28)             | 94 (0.30)                 |
| Foreign body removal (nose, ear, or skin)   | 9 (0.01)          | 5 (0.02)              | 9 (0.03)                  |
| Gastrointestinal (upper or lower endoscopy) | 9,794 (11.86)     | 638 (2.51)            | 2,619 (8.40)              |
| Oncology (lumbar puncture or bone marrow)   | 14,226 (17.23)    | 2,199 (8.66)          | 4,254 (13.64)             |
| Neurology (EEG)                             | 4,623 (5.60)      | 1,476 (5.81)          | 1,923 (6.16)              |
| Ophthalmology examination                   | 68 (0.08)         | 30 (0.12)             | 31 (0.10)                 |
| Radiology (MRI or CT scan)                  | 44,168 (53.51)    | 17,963 (70.72)        | 18,789 (60.23)            |
| Sexual abuse examination                    | 15 (0.02)         | 3 (0.01)              | 8 (0.03)                  |
| Surgical (minor procedure)                  | 6,881 (8.34)      | 1,914 (7.54)          | 2,548 (8.17)              |

Entries in each cell are the counts and column percentages stratified by NPO status. For example, airway procedures comprised 0.86% of the 82,546 procedures for which NPO status is known. Examples are given in parentheses for some procedures and are not meant to be an exhaustive classification.

CT = computed tomography; EEG = electroencephalogram; MRI = magnetic resonance image; NPO = *nil per os*.

**Table 2.** Medications Used during Sedation

|                     | NPO<br>N = 82,546 | Not NPO<br>N = 25,401 | Missing NPO<br>N = 31,195 |
|---------------------|-------------------|-----------------------|---------------------------|
| Analgesics          | 15,837 (19.19)    | 3,941 (15.52)         | 5,665 (18.16)             |
| Anticholinergics    | 5,718 (6.93)      | 1,663 (6.55)          | 2,114 (6.78)              |
| Antiemetics         | 2,294 (2.78)      | 104 (0.41)            | 616 (1.97)                |
| Distraction         | 6,538 (7.92)      | 1,267 (4.99)          | 2,666 (8.55)              |
| Inhaled anesthetics | 1,762 (2.13)      | 621 (2.44)            | 428 (1.37)                |
| Inhaled medications | 345 (0.42)        | 61 (0.24)             | 111 (0.36)                |
| Local anesthesia    | 18,780 (22.75)    | 3,861 (15.20)         | 4,789 (15.35)             |
| Muscle relaxants    | 170 (0.21)        | 36 (0.14)             | 59 (0.19)                 |
| Sedatives           | 81,948 (99.28)    | 24,998 (98.41)        | 30,972 (99.29)            |
| Reversal agents     | 15 (0.02)         | 3 (0.01)              | 3 (0.01)                  |
| Ativan              | 40 (0.05)         | 18 (0.07)             | 20 (0.06)                 |
| Chloral hydrate     | 3,126 (3.79)      | 1,729 (6.81)          | 1,923 (6.16)              |
| Dexmedetomidine     | 6,130 (7.43)      | 744 (2.93)            | 1,855 (5.95)              |
| Etomidate           | 108 (0.13)        | 57 (0.22)             | 70 (0.22)                 |
| Ketamine            | 5,305 (6.43)      | 2,050 (8.07)          | 2,252 (7.22)              |
| Methohexital        | 409 (0.50)        | 194 (0.76)            | 139 (0.45)                |
| Midazolam           | 18,133 (21.97)    | 6,021 (23.70)         | 8,931 (28.63)             |
| Pentobarbital       | 3,701 (4.48)      | 837 (3.30)            | 4,006 (12.84)             |
| Propofol            | 62,779 (76.05)    | 18,685 (73.56)        | 19,447 (62.34)            |
| Thiopental          | 328 (0.40)        | 174 (0.69)            | 239 (0.77)                |
| Valium              | 11 (0.01)         | 7 (0.03)              | 4 (0.01)                  |

Entries in each cell are the counts and column percentages stratified by NPO status. For example, propofol was used in 76.05% of the 82,546 sedations procedures for which NPO status is known.

NPO = *nil per os*.

#### Reference

Beach ML, Cohen DM, Gallagher SM, Cravero JP: Major adverse events and relationship to *nil per os* status in pediatric sedation/anesthesia outside the operating room: A report of the Pediatric Sedation Research Consortium. *ANESTHESIOLOGY* 2016; 124:80–8
